# Supplementary material for: High electrochemical performance in asymmetric supercapacitors using MWCNT/nickel sulfide composite and graphene nanoplatelets as electrodes
Source: Royal Society of Chemistry journal article supplement (doi:10.1039/c4ta02870h), 2014-01-01
Supplement: c4ta02870h1.pdf [file c4ta02870h1.pdf]

## Supplementary Information

### **High Electrochemical performance in Asymmetric Supercapacitors using MWCNTs/Nickel Sulfide Composite and Graphene Nanoplatelets as Electrodes**

Arvinder Singh,<sup>1</sup> Alexander J. Roberts, <sup>\*2</sup> Robert C. T. Slade<sup>2</sup> and Amreesh Chandra<sup>\*1</sup>

<sup>1</sup>Department of Physics, Indian Institute of Technology Kharagpur, Kharagpur-721302, West Bengal,  
India.

Fax: +91 (0)3222255303; Tel:+91(0)3222 283820;

<sup>2</sup>Department of Chemistry, University of Surrey, Guildford, Surrey GU2 7XH, UK.

Fax: +44 (0)1483683016; Tel:+44 (0)1483 686834

\*E-mail: [achandra@phy.iitkgp.ernet.in](mailto:achandra@phy.iitkgp.ernet.in), [a.roberts@surrey.ac.uk](mailto:a.roberts@surrey.ac.uk)

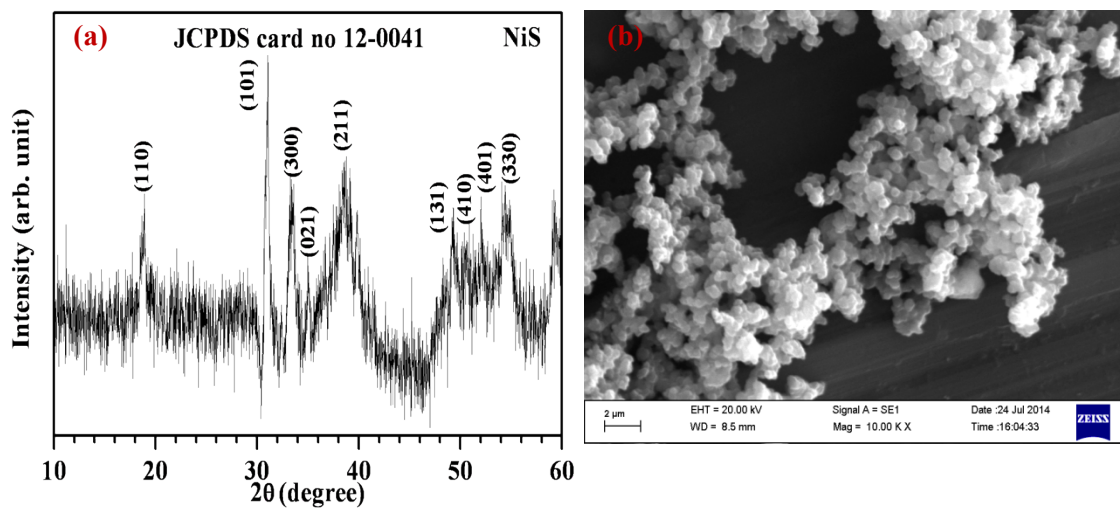

**Figure S1** (a) XRD pattern and (b) SEM micrograph observed for the synthesized NiS.

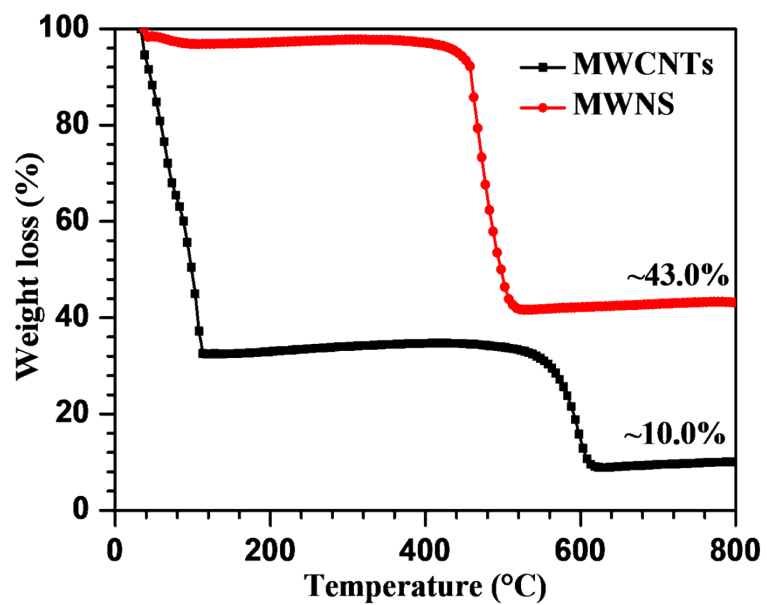

Figure S2 TGA curves for MW and MWNS composite.

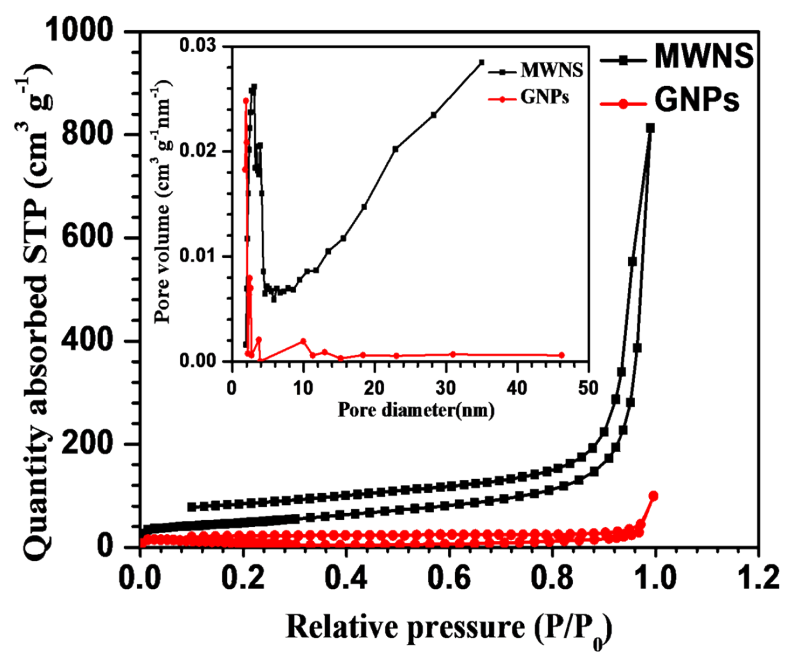

**Figure S3** N<sub>2</sub> adsorption-desorption curves for GNPs and MWNS composite. Inset shows the pore size distribution for GNPs and MWNS composite.

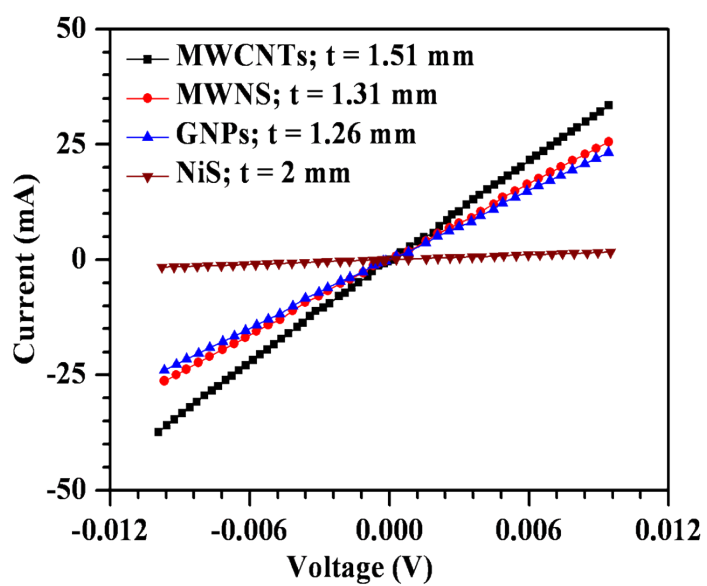

**Figure S4** Four probe I-V curves for MWCNTs, MWNS, GNPs and NiS.

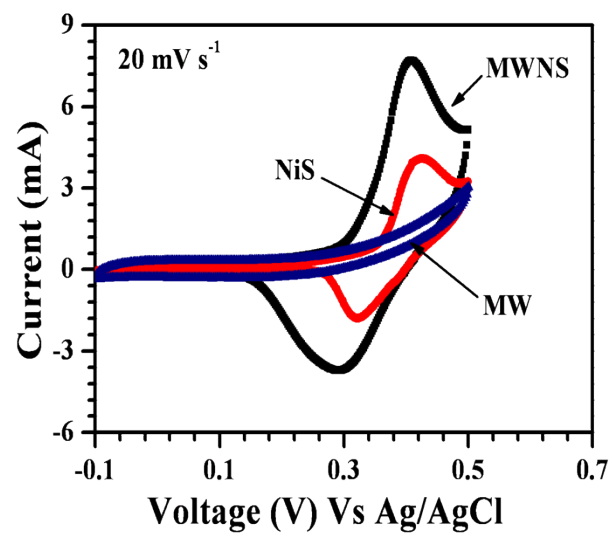

**Figure S5** Three electrode CV curves for MW, NiS and MWNS composite using activated carbon as counter electrode and Ag/AgCl (sat. KCl) as a reference electrode.

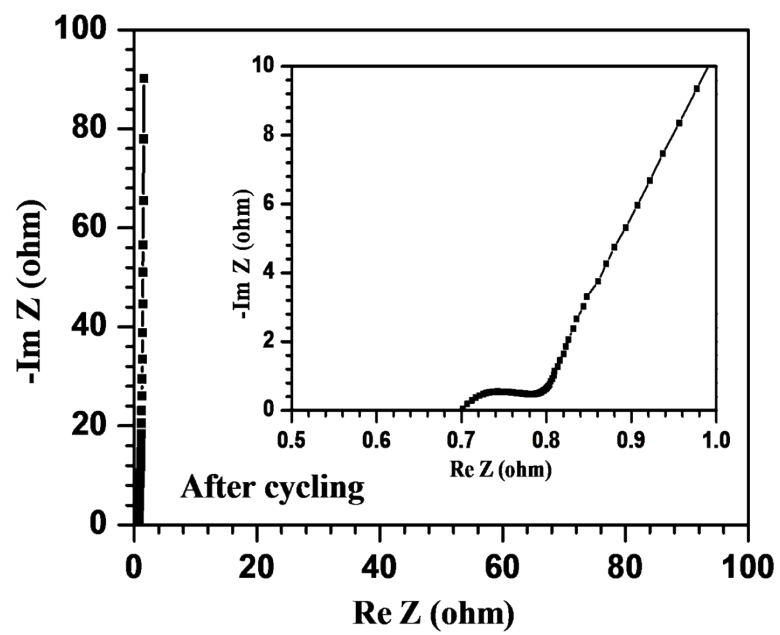

**Figure S6** Nyquist plot obtained after operating ASCs for 1000 charge-discharge cycles.
